# Supplementary material for: Miniemulsions as chemical nanoreactors for the room temperature synthesis of inorganic crystalline nanostructures: ZnO colloids
Source: Royal Society of Chemistry journal article supplement (doi:10.1039/c1jm13301b), 2011-12-01
Supplement: c1jm13301b.pdf [file c1jm13301b.pdf]

# Miniemulsions as chemical nanoreactors for the room temperature synthesis of inorganic crystalline nanostructures: ZnO colloids

Paolo Dolcet<sup>a</sup>, Maurizio Casarin,<sup>a,b</sup> Chiara Maccato<sup>a</sup>, Laura Bovo<sup>a</sup>,  
Gloria Ischia<sup>c</sup>, Stefano Gialanella<sup>c</sup>, Fabrizio Mancin<sup>a</sup>, Eugenio Tondello<sup>a,b</sup>, Silvia Gross<sup>a,b\*</sup>

<sup>a</sup>Dipartimento di Scienze Chimiche, Università degli Studi di Padova, via Marzolo, 1, I-35131, Padova, Italy

<sup>b</sup>Istituto di Scienze e Tecnologie Molecolari, ISTM-CNR via Marzolo, 1, I-35131, Padova, Italy

<sup>c</sup>Dipartimento di Ingegneria dei Materiali e Tecnologie Industriali, Via Mesiano 77, 38123 Trento, Italy

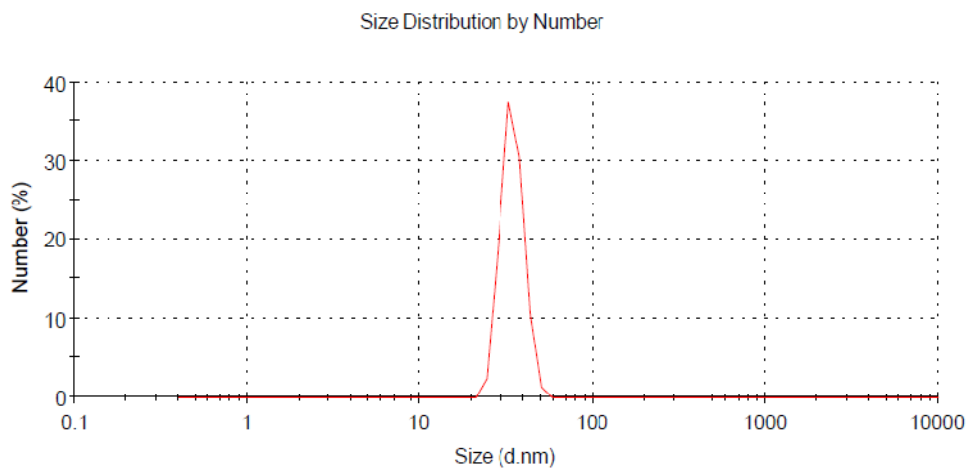

Fig. S1 - Distribution of the average hydrodynamic ratio of the miniemulsion obtained by Triton X-100

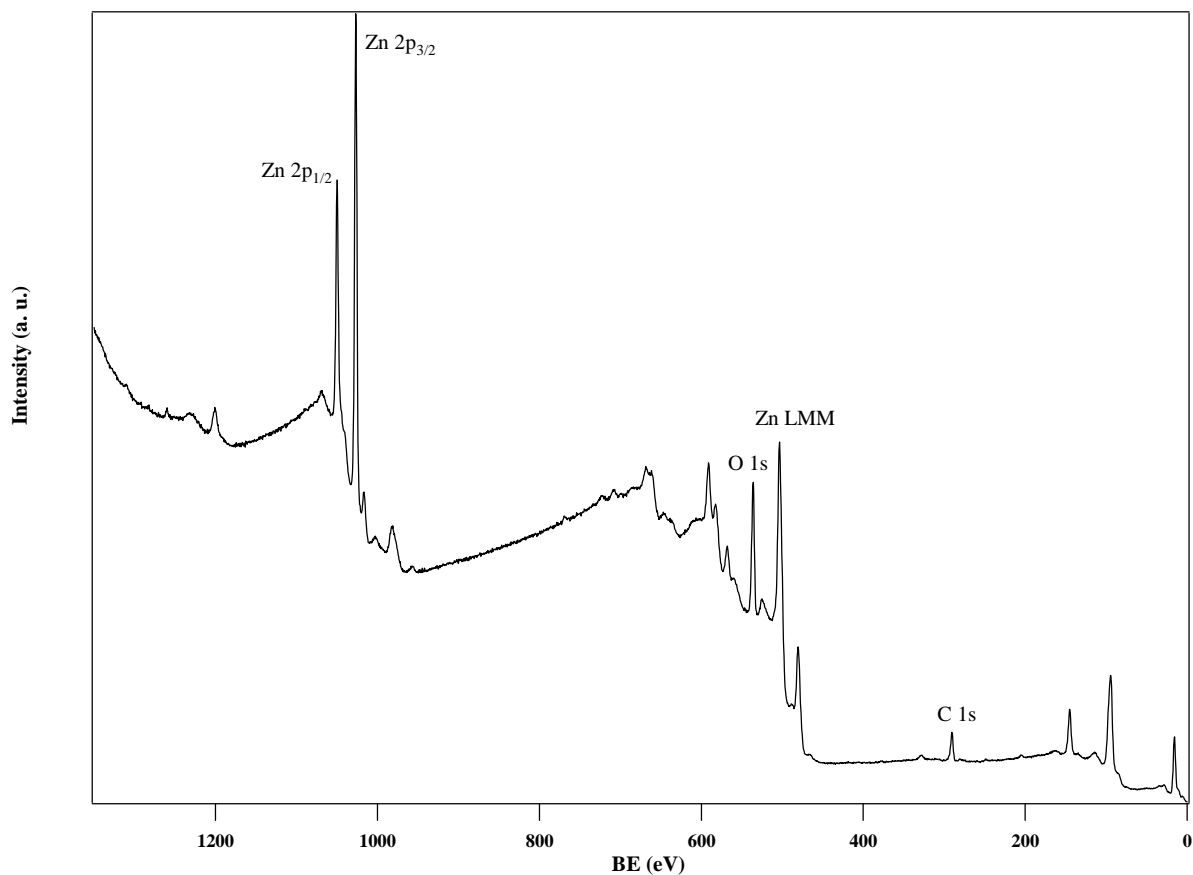

Fig. S2 - Survey spectrum of ZnO nanoparticles obtained using Triton-X 100 as surfactant

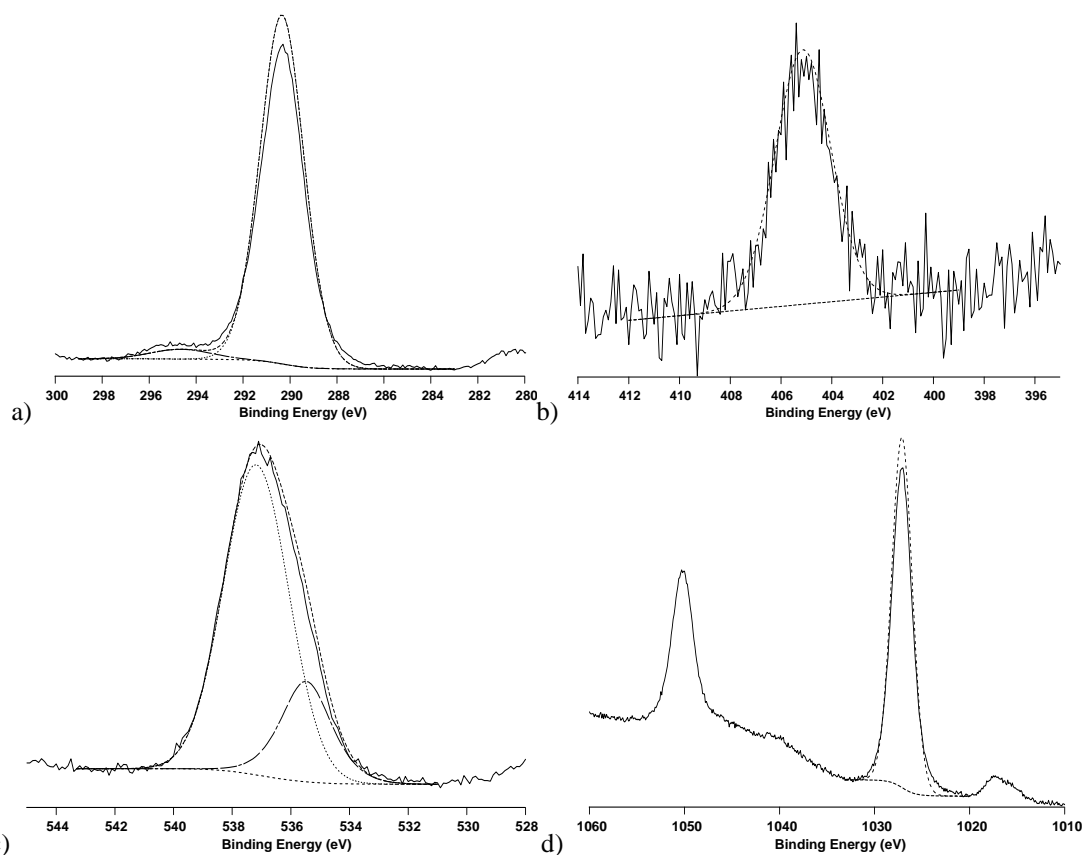

Fig. S3 – XPS peaks of ZnO<sup>PVP</sup>, with deconvolution: a) C1s, b) N1s, c) O1s, d) Zn2p<sub>3/2</sub> (values not corrected for charging effect)

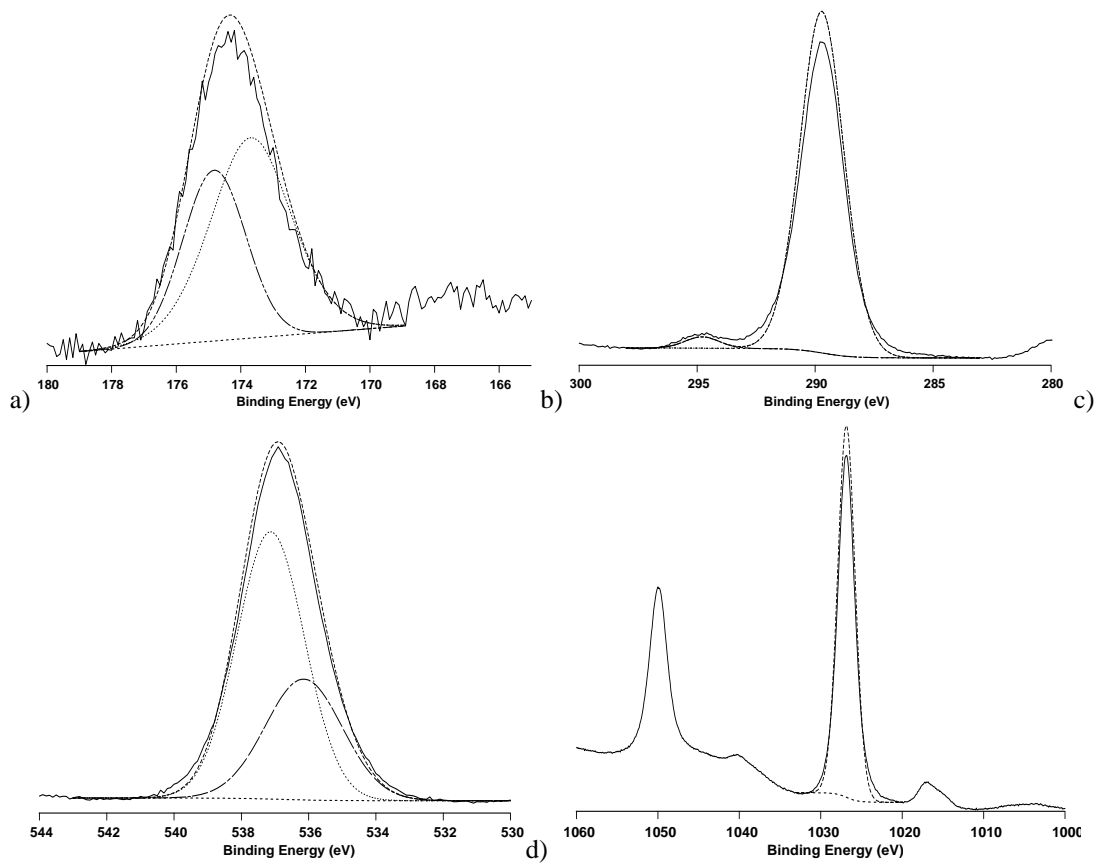

Fig. S4 – XPS peaks of ZnO<sup>SDS</sup>, with deconvolution: a) S2p, b) C1s, c) O1s, d) Zn2p<sub>3/2</sub> (values not corrected for charging effect)

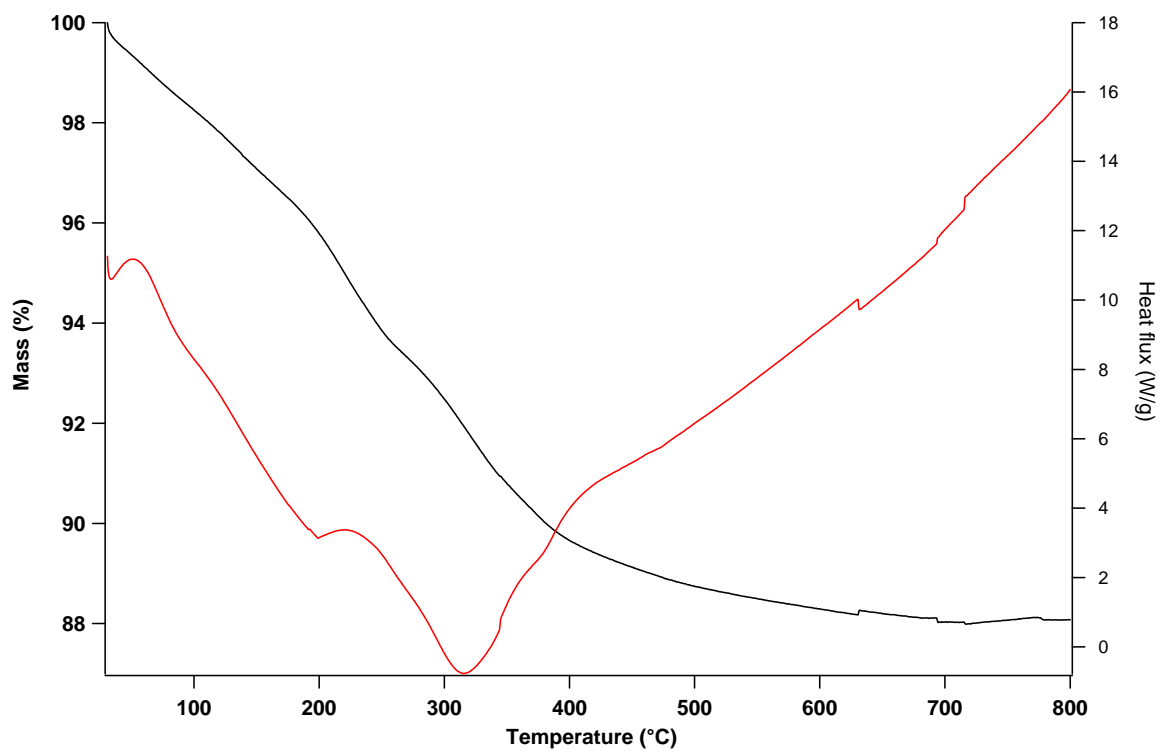

Fig. S5 – Thermogram (black) and calorimetry (red) of ZnO<sup>PVP</sup>

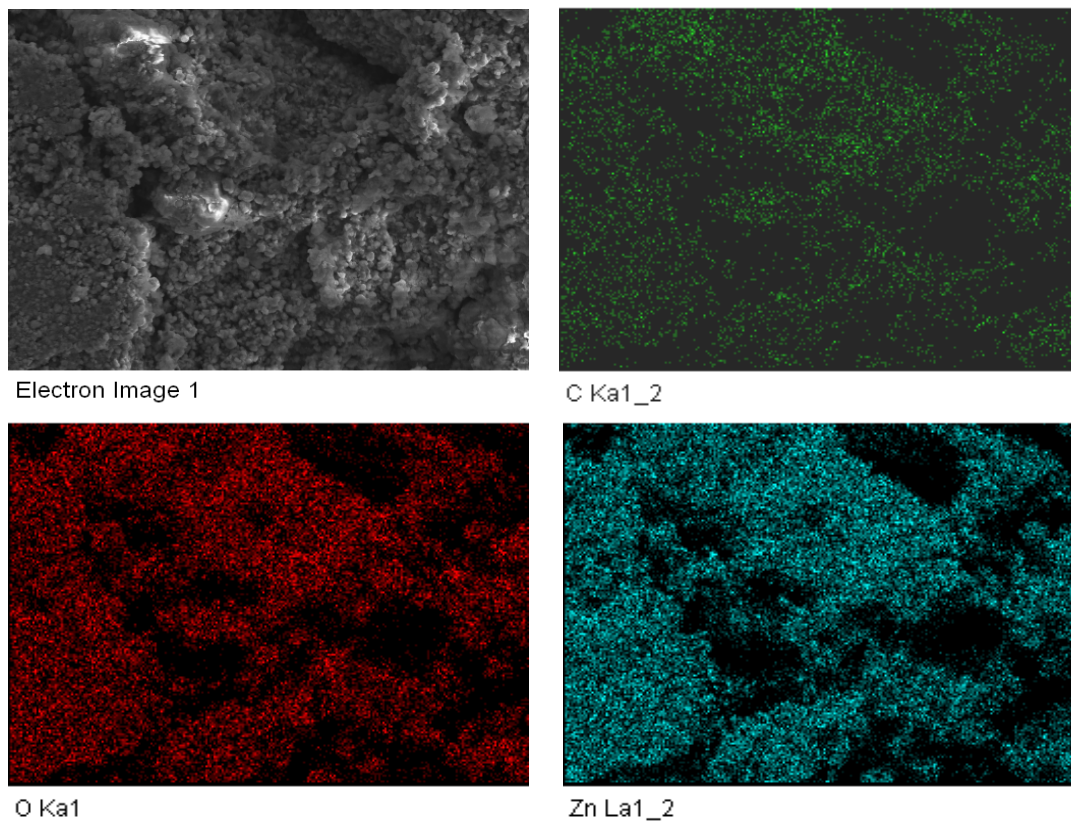

Fig. S6- EDX compositional maps of ZnO<sup>PVP</sup> sample

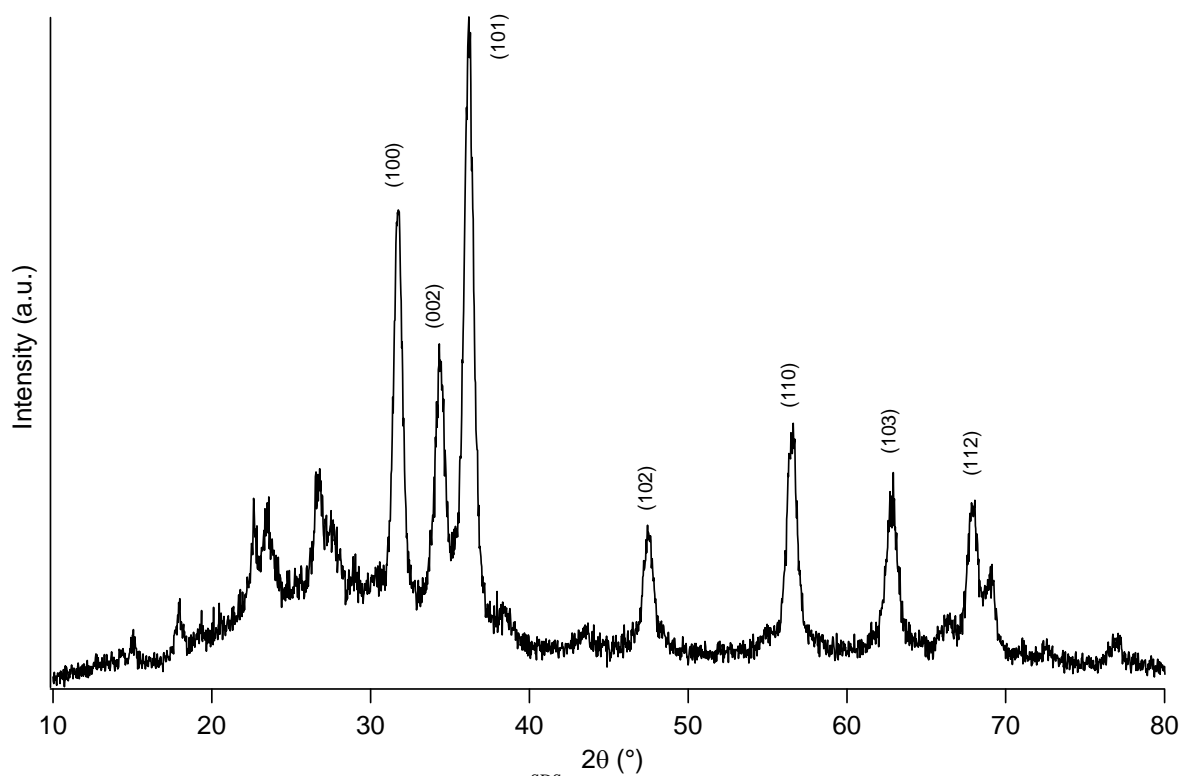

Fig. S7 - XRD pattern of  $\text{ZnO}^{\text{SDS}}$ , after thermal treatment at  $200^\circ\text{C}$  for 4h

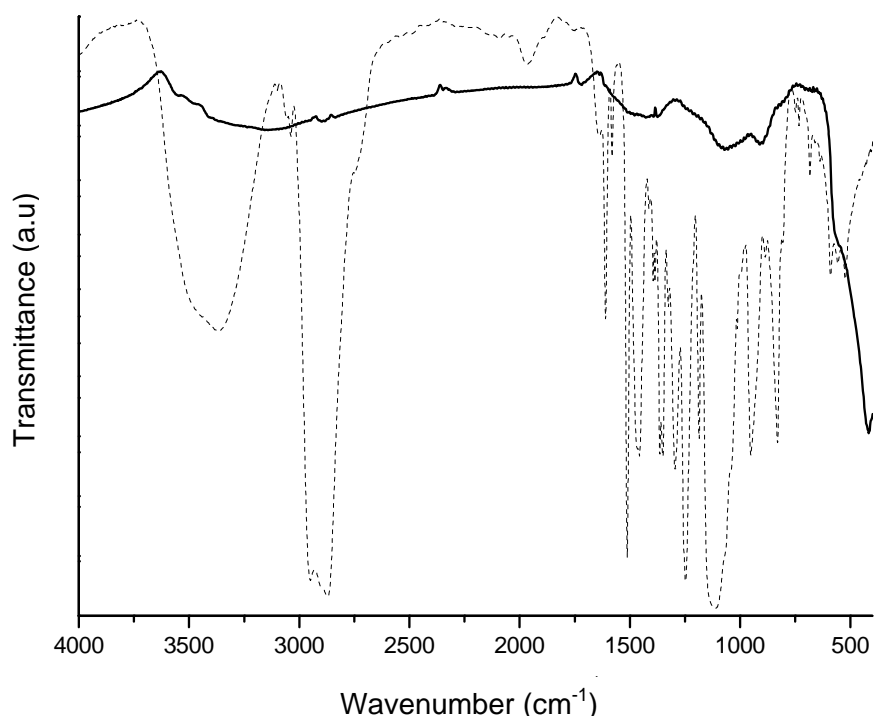

Fig. S8 - FT-IR spectra of TritonX-100 (dashed line) and surfactant-functionalized  $\text{ZnO}^{\text{TritonX}}$  NPs (solid line)
